# Supplementary material
Source: publisher site journal article supplement (https://www.spandidos-publications.com/5813/downloadSupplementary)

Figure S1. Kaplan-Meier curves displaying the estimated survival probability according to the organic dysfunction degree (SOFA score) at ICU admission. ICU, Intensive Care Unit; SOFA, Sequential Organ Failure Assessment.

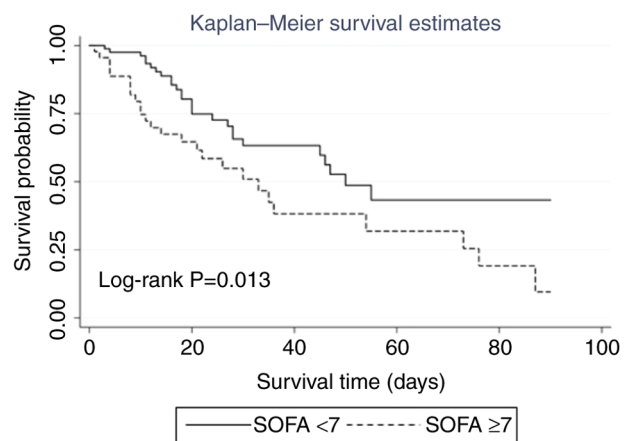

Supplement: Supplementary file 1 [file downloadSupplementary]
